# Supplementary material for: Eye in a Disk: eyeIntegration Human Pan-Eye and Body Transcriptome Database Version 1.0
Source: PubMed Central journal article supplement — Invest Ophthalmol Vis Sci. 2019 Jul;60(8):3236–46. doi: 10.1167/iovs.19-27106 (PMC6660187; doi:10.1167/iovs.19-27106), 2019-07
Supplement: iovs-60-08-01_s03.pdf [file iovs-60-08-01_s03.pdf]

## Supplementary Figures and Tables

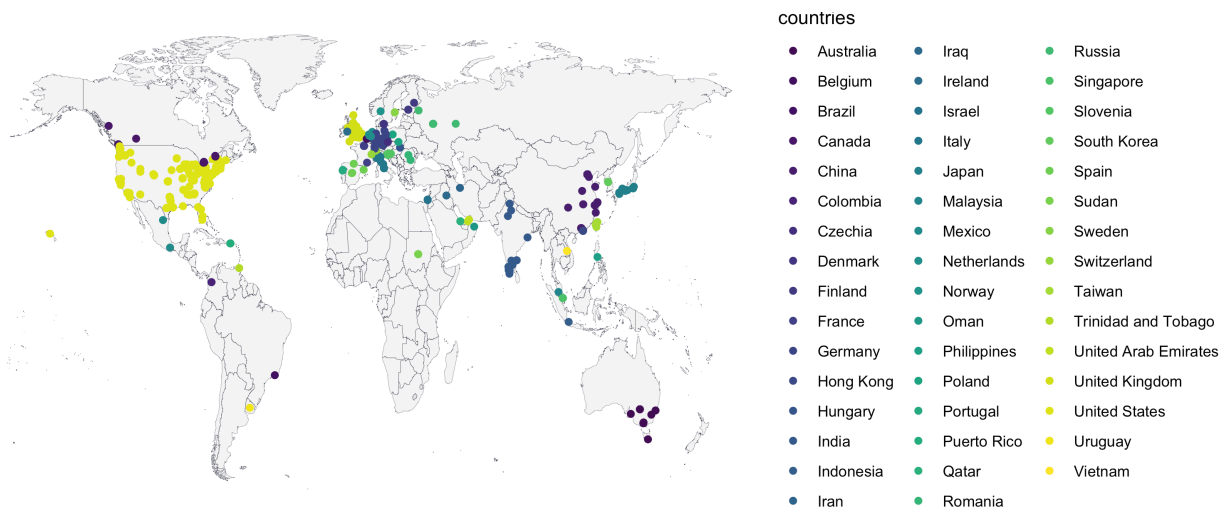

Supplemental Figure 1: As of June 2019, eyeIntegratoin has had usage across 367 cities and 47 countries.

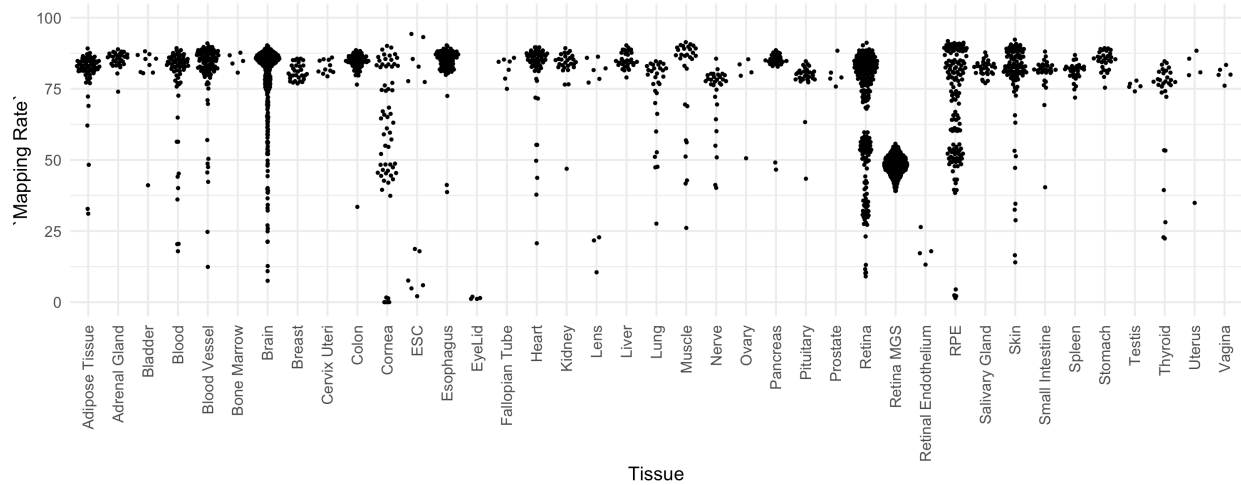

Supplemental Figure 2: Salmon mapping rate for each sample, grouped by tissue type. 1st quartile mapping rate is 51.5%, median is 80.5%, mean is 70.5%, and third quartile is 85.1%.

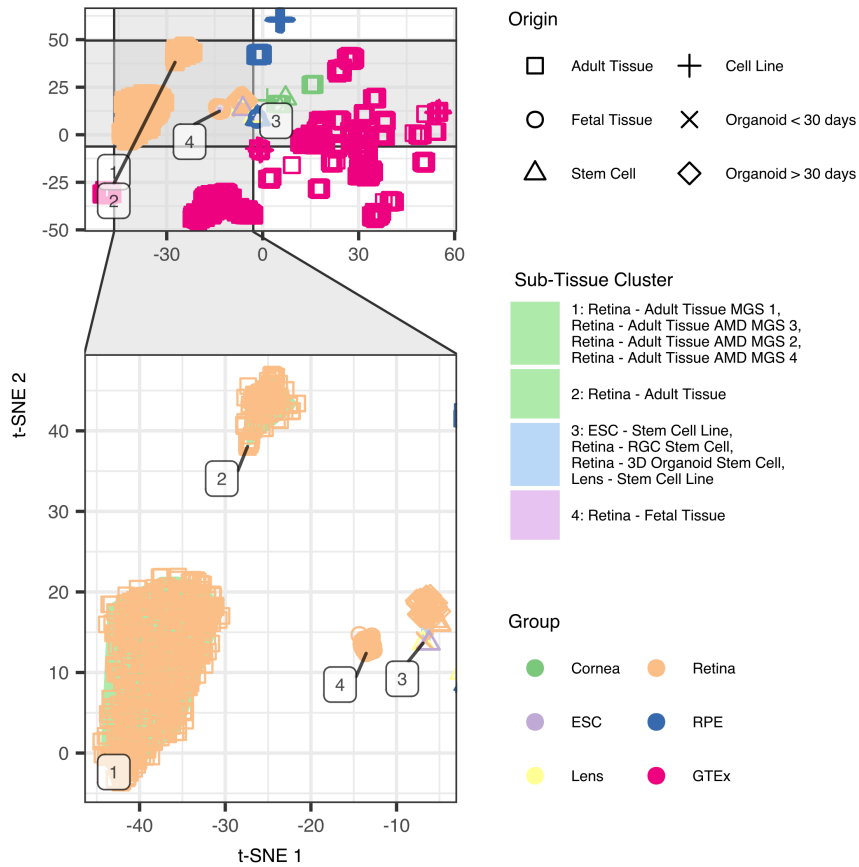

Supplemental Figure 3: Adult retina samples from Ratnapriya et al. (MGS 1 - 4, not-AMD is MGS 1, AMD is MGS 2 through 4) cluster independently from all other adult retina samples collected.

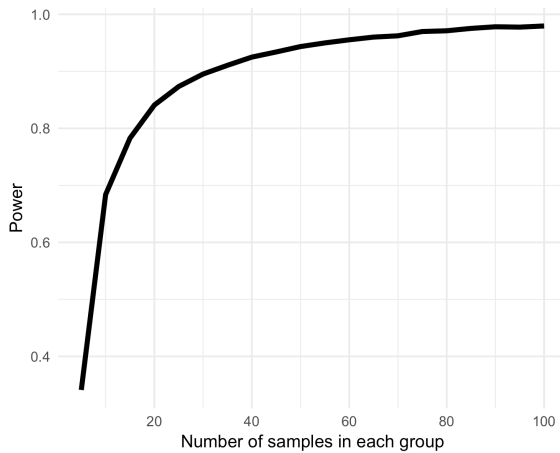

Supplemental Figure 4: Power curve to assess ability to detect  $\geq 1 \log_2(\text{FoldChange})$  in gene expression between  $n$  samples ( $x$ -axis) in each group.

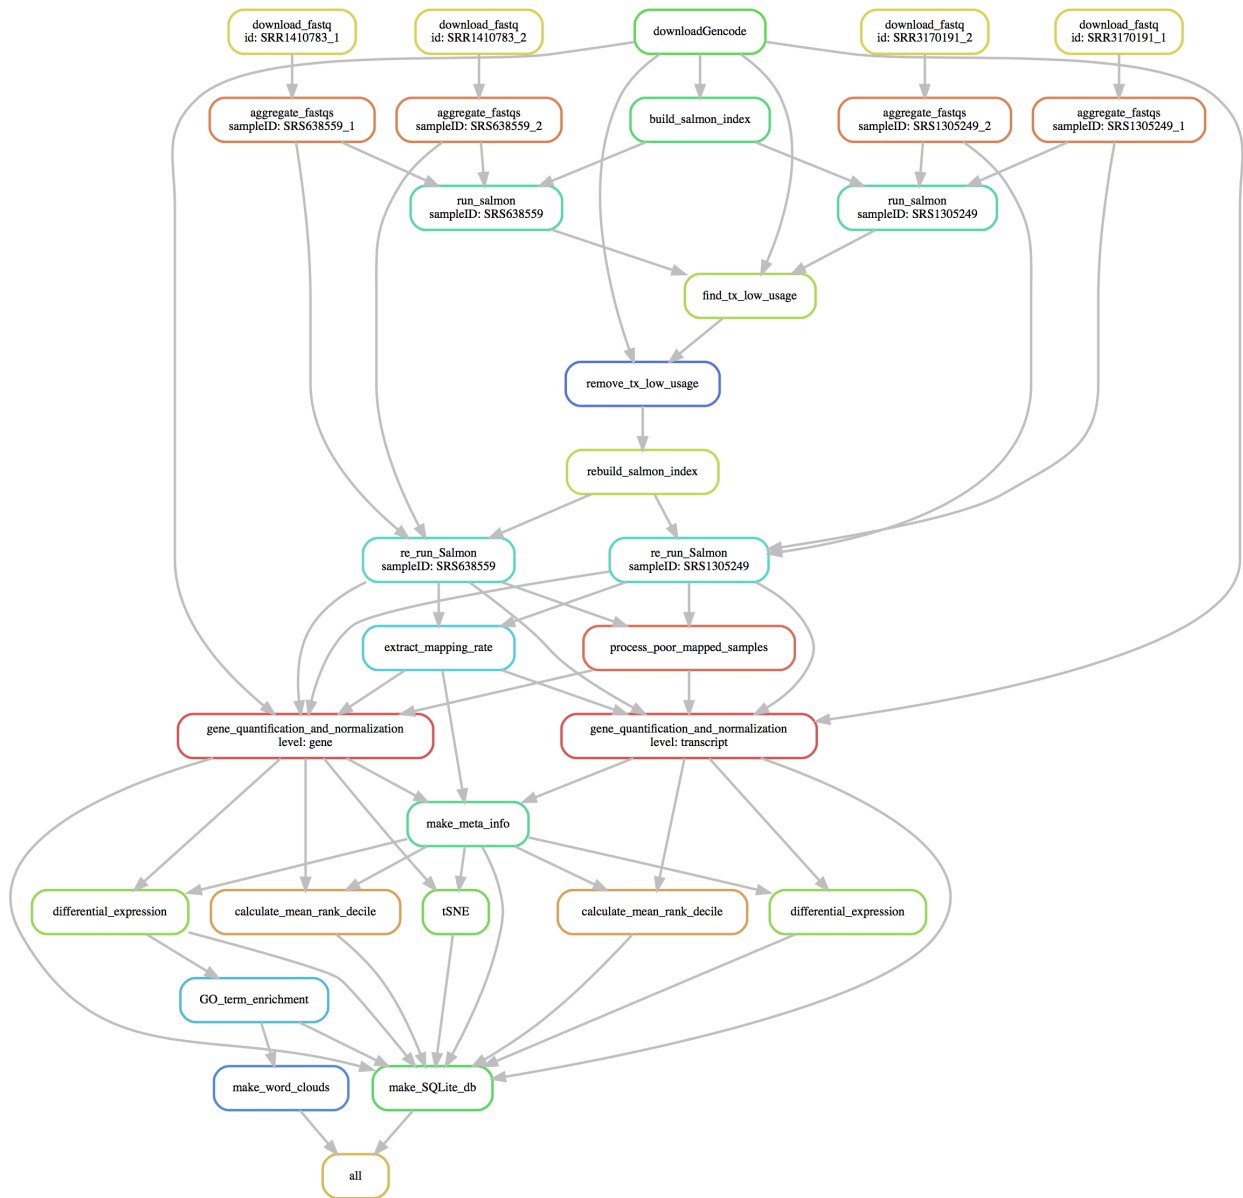

Supplemental Figure 5: Snakemake pipeline to create EiaD 2019 consists of small modular compute sections to ensure sample tracking through the full pipeline

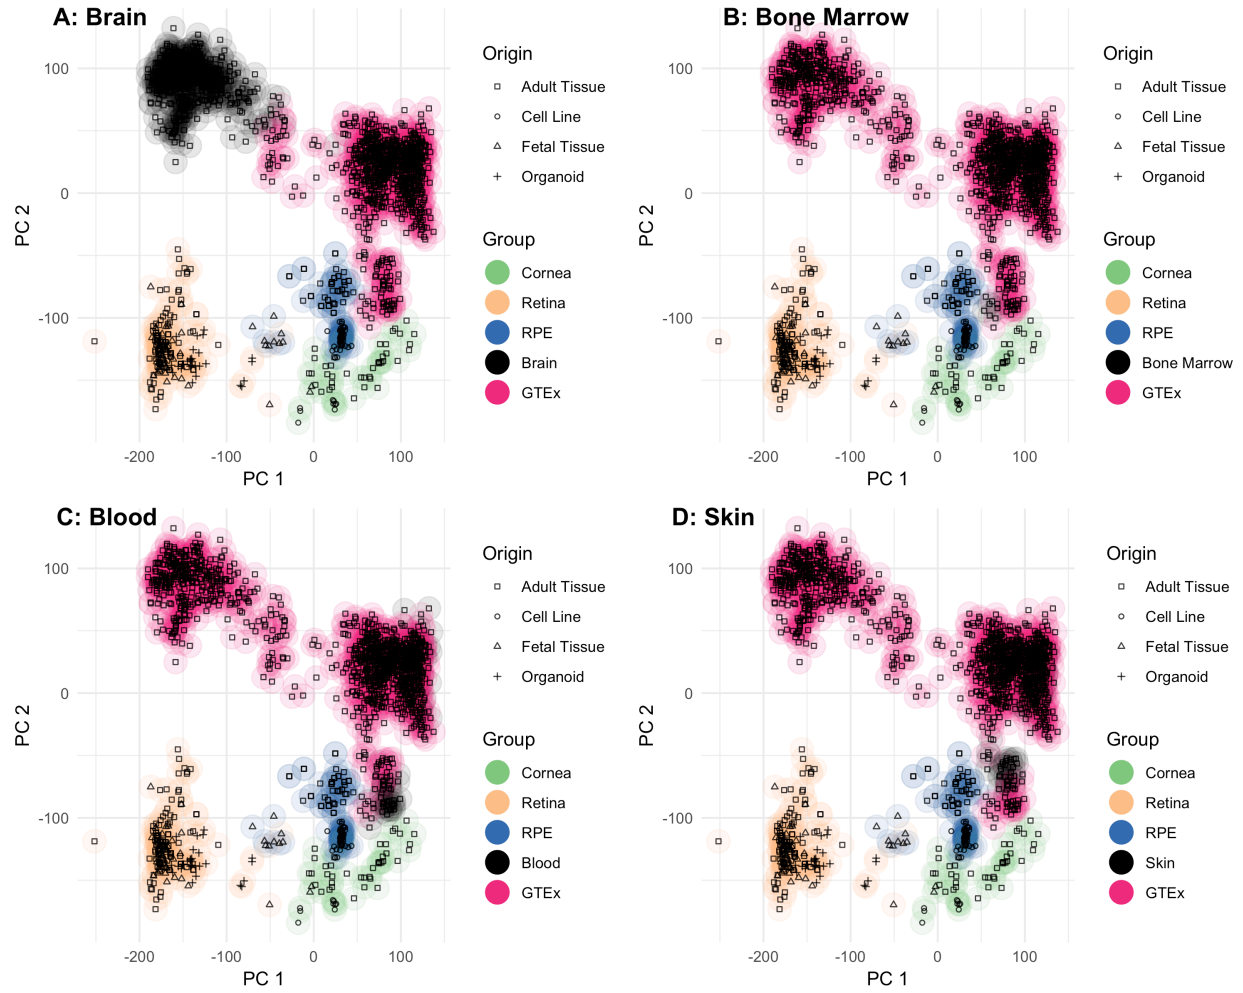

*Supplemental Figure 6: PCA plot of all samples suggests that the non-eye tissue most similar to adult retina is the brain, RPE and cornea are most similar to bone marrow, blood, and skin*

A

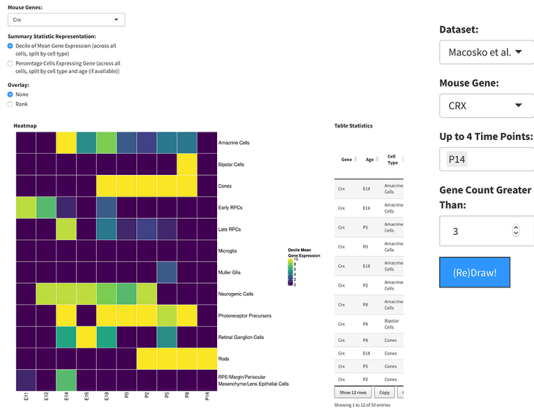

B

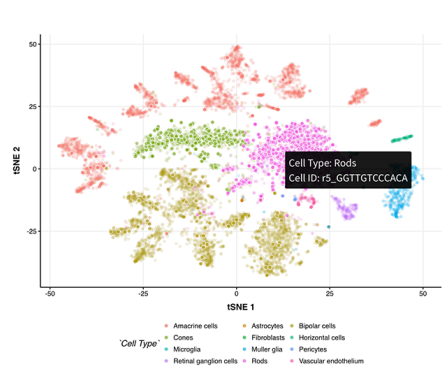

C

Class: protein\_coding

Search for Differential Expression Comparison: Retina (Organoid) vs Retina (Adult Tissue)

| ID | logFC   | AveExpr | t     | PValue | adj.P.Val | B         | Class  |                |
|----|---------|---------|-------|--------|-----------|-----------|--------|----------------|
| 1  | OPN1LW  | -13.52  | -3.28 | -58.18 | 1.48e-215 | 5.46e-212 | 482.50 | protein_coding |
| 2  | KCNJ14  | -6.35   | 2.10  | -36.57 | 2.22e-119 | 9.09e-116 | 107.27 | protein_coding |
| 3  | SLC24A1 | -5.12   | 4.02  | -94.64 | 2.52e-131 | 6.20e-128 | 289.47 | protein_coding |
| 4  | OPN1MW3 | -6.66   | -4.37 | -33.38 | 5.73e-126 | 1.24e-122 | 276.10 | protein_coding |
| 5  | GUCY2F  | -8.43   | -3.12 | -33.06 | 1.44e-124 | 2.94e-121 | 272.89 | protein_coding |
| 6  | PIW1L   | -9.69   | -1.74 | -32.52 | 3.21e-122 | 6.24e-119 | 267.61 | protein_coding |
| 7  | STK35   | -4.10   | 6.25  | -30.49 | 2.53e-113 | 3.59e-110 | 248.19 | protein_coding |
| 8  | ZNF229  | -7.55   | 2.49  | -29.56 | 3.45e-109 | 4.24e-106 | 237.89 | protein_coding |
| 9  | LRH1L   | -4.87   | 2.61  | -28.68 | 3.33e-105 | 3.50e-102 | 229.36 | protein_coding |
| 10 | KOFT40  | -8.07   | -3.32 | -28.23 | 3.84e-103 | 3.83e-100 | 224.38 | protein_coding |

Showing 1 to 10 of 18,949 entries

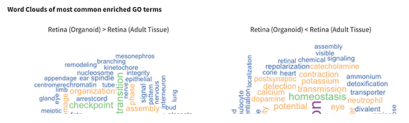

D

Dataset: Gene 2019

Tissue: Retina

Gene: TYRP1

Columns: sample\_accession, study\_accession, study\_title, run\_accession, Tissue, Sub\_Tissue, Origin

| ID    | value  | sample_accession | study_accession | study_title                                                                 | run_accession | Tissue | Sub_Tissue   | Origin       |
|-------|--------|------------------|-----------------|-----------------------------------------------------------------------------|---------------|--------|--------------|--------------|
| TYRP1 | 885.63 | SRR1283794       | SRR1005002      | RNA-seq of retinal tissue from a Human Eye                                  | SRR1017214    | Retina | Adult Tissue | Adult Tissue |
| TYRP1 | 495.19 | SRR1283794       | SRR1005002      | RNA-seq of retinal tissue from a Human Eye                                  | SRR1017213    | Retina | Adult Tissue | Adult Tissue |
| TYRP1 | 699.42 | SRR1283794       | SRR1005006      | Region-specific Transcriptome Analysis of the Human Retina and RPE/Organoid | SRR1094771    | Retina | Adult Tissue | Adult Tissue |
| TYRP1 | 696.17 | SRR1283794       | SRR1005006      | Region-specific Transcriptome Analysis of the Human Retina and RPE/Organoid | SRR1094772    | Retina | Adult Tissue | Adult Tissue |
| TYRP1 | 685.19 | SRR1283794       | SRR1005006      | Region-specific Transcriptome Analysis of the Human Retina and RPE/Organoid | SRR1094773    | Retina | Adult Tissue | Adult Tissue |

Showing 1 to 5 of 223 entries

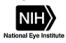

Supplemental Figure 7: A. CRX mouse retina gene expression heatmap and table information from Clark et al. E11 to P14 scRNA-seq. B. t-SNE visualization of gene expression profiles of individual cells from Macosko et al. C. Data table export view. D. Differential gene expression across different tissues and with GO term enrichment.

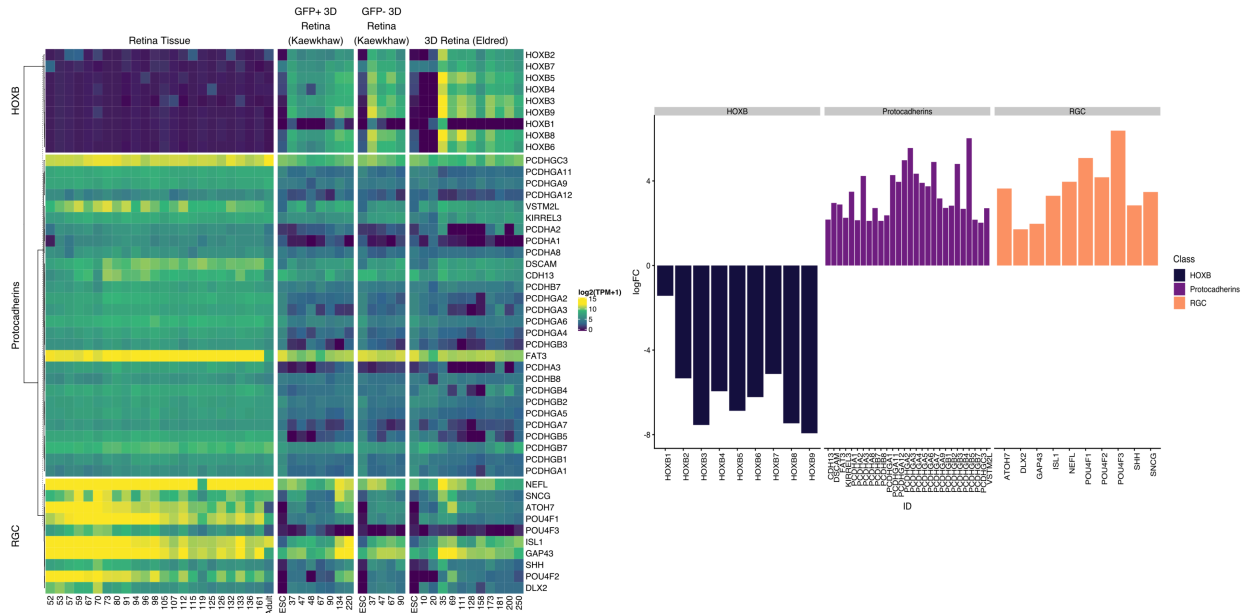

Supplemental Figure 8: Heatmap of three sets of genes across fetal retina and organoids divided by age in days (A). Bar plot of differential expression from retina to organoid, where positive values are genes that are higher expressed in fetal tissue than organoid (B). All logFC expression values have FDR corrected  $p$  value  $< 0.01$ .

| Group | Version | Pre QC Count | Count | Tissue Types (Count)                                                                                                                                                                                                                                                                                                                                                                                                                                                  |
|-------|---------|--------------|-------|-----------------------------------------------------------------------------------------------------------------------------------------------------------------------------------------------------------------------------------------------------------------------------------------------------------------------------------------------------------------------------------------------------------------------------------------------------------------------|
| GTEx  | 2017    | 847          | 847   | Adipose Tissue (39), Adrenal Gland (20), Blood (26), Blood Vessel (57), Brain (255), Breast (20), Colon (40), Esophagus (59), Heart (37), Kidney (17), Liver (20), Lung (20), Muscle (19), Nerve (20), Pancreas (20), Pituitary (20), Salivary Gland (20), Skin (59), Small Intestine (20), Spleen (20), Stomach (19), Thyroid (20)                                                                                                                                   |
| GTEx  | 2019    | 1375         | 1314  | Adipose Tissue (54), Adrenal Gland (30), Bladder (9), Blood (49), Blood Vessel (88), Bone Marrow (5), Brain (372), Breast (30), Cervix Uteri (11), Colon (58), Esophagus (87), Fallopian Tube (7), Heart (58), Kidney (27), Liver (30), Lung (29), Muscle (29), Nerve (30), Ovary (4), Pancreas (30), Pituitary (29), Prostate (5), Salivary Gland (30), Skin (83), Small Intestine (29), Spleen (30), Stomach (30), Testis (5), Thyroid (27), Uterus (4), Vagina (5) |

Supplemental Table 1: EiaD holds hundreds of GTEx tissues to provide a broad comparison set

| Biotype                       | Gene Count | Transcript Count | Definition                                                                                                                                                                |
|-------------------------------|------------|------------------|---------------------------------------------------------------------------------------------------------------------------------------------------------------------------|
| bidirectional_promoter_lncRNA | 68         | 122              | A non-coding locus that originates from within the promoter region of a protein-coding gene, with transcription proceeding in the opposite direction on the other strand. |
| unitary_pseudogene            | 22         | 21               | A species-specific unprocessed pseudogene without a parent gene, as it has an active orthologue in another species.                                                       |
| retained_intron               |            | 6552             | Alternatively spliced transcript believed to contain intronic sequence relative to other, coding, variants.                                                               |
| protein_coding                | 19012      | 34969            | Contains an open reading frame (ORF).                                                                                                                                     |
| processed_transcript          | 533        | 4635             | Doesn't contain an ORF.                                                                                                                                                   |
| antisense                     | 4014       | 5656             | Has transcripts that overlap the genomic span (i.e. exon or introns) of a protein-coding locus on the opposite strand.                                                    |

| Biotype                          | Gene Count | Transcript Count | Definition                                                                                                                                                                                                                                                                                                                                                                                                            |
|----------------------------------|------------|------------------|-----------------------------------------------------------------------------------------------------------------------------------------------------------------------------------------------------------------------------------------------------------------------------------------------------------------------------------------------------------------------------------------------------------------------|
| pseudogene                       | 11         | 19               | Have homology to proteins but generally suffer from a disrupted coding sequence and an active homologous gene can be found at another locus. Sometimes these entries have an intact coding sequence or an open but truncated ORF, in which case there is other evidence used (for example genomic polyA stretches at the 3' end) to classify them as a pseudogene. Can be further classified as one of the following. |
| nonsense_mediated_decay          |            | 3402             | If the coding sequence (following the appropriate reference) of a transcript finishes >50bp from a downstream splice site then it is tagged as NMD. If the variant does not cover the full reference coding sequence then it is annotated as NMD if NMD is unavoidable i.e. no matter what the exon structure of the missing portion is the transcript will be subject to NMD.                                        |
| IG_C_gene                        | 14         | 17               | Immunoglobulin (Ig) variable chain and T-cell receptor (TcR) genes imported or annotated according to the IMGT.                                                                                                                                                                                                                                                                                                       |
| IG_J_gene                        | 2          | 2                | Immunoglobulin (Ig) variable chain and T-cell receptor (TcR) genes imported or annotated according to the IMGT.                                                                                                                                                                                                                                                                                                       |
| IG_V_gene                        | 127        | 127              | Immunoglobulin (Ig) variable chain and T-cell receptor (TcR) genes imported or annotated according to the IMGT.                                                                                                                                                                                                                                                                                                       |
| TR_C_gene                        | 6          | 6                | Immunoglobulin (Ig) variable chain and T-cell receptor (TcR) genes imported or annotated according to the IMGT.                                                                                                                                                                                                                                                                                                       |
| TR_J_gene                        | 6          | 6                | Immunoglobulin (Ig) variable chain and T-cell receptor (TcR) genes imported or annotated according to the IMGT.                                                                                                                                                                                                                                                                                                       |
| TR_V_gene                        | 41         | 36               | Immunoglobulin (Ig) variable chain and T-cell receptor (TcR) genes imported or annotated according to the IMGT.                                                                                                                                                                                                                                                                                                       |
| IG_C_pseudogene                  | 3          | 3                | Inactivated immunoglobulin gene.                                                                                                                                                                                                                                                                                                                                                                                      |
| IG_J_pseudogene                  | 1          | 1                | Inactivated immunoglobulin gene.                                                                                                                                                                                                                                                                                                                                                                                      |
| IG_V_pseudogene                  | 21         | 18               | Inactivated immunoglobulin gene.                                                                                                                                                                                                                                                                                                                                                                                      |
| TR_V_pseudogene                  | 4          | 4                | Inactivated immunoglobulin gene.                                                                                                                                                                                                                                                                                                                                                                                      |
| sense_intronic                   | 659        | 664              | Long non-coding transcript in introns of a coding gene that does not overlap any exons.                                                                                                                                                                                                                                                                                                                               |
| sense_overlapping                | 153        | 180              | Long non-coding transcript that contains a coding gene in its intron on the same strand.                                                                                                                                                                                                                                                                                                                              |
| lincRNA                          | 4323       | 5881             | Long, intervening noncoding (linc) RNA that can be found in evolutionarily conserved, intergenic regions.                                                                                                                                                                                                                                                                                                             |
| rRNA_pseudogene                  | 24         | 24               | Non-coding RNA predicted to be pseudogene by the Ensembl pipeline                                                                                                                                                                                                                                                                                                                                                     |
| miRNA                            | 130        | 130              | Non-coding RNA predicted using sequences from Rfam and miRBase                                                                                                                                                                                                                                                                                                                                                        |
| misc_RNA                         | 260        | 260              | Non-coding RNA predicted using sequences from Rfam and miRBase                                                                                                                                                                                                                                                                                                                                                        |
| Mt_rRNA                          | 2          | 2                | Non-coding RNA predicted using sequences from Rfam and miRBase                                                                                                                                                                                                                                                                                                                                                        |
| Mt_tRNA                          | 22         | 22               | Non-coding RNA predicted using sequences from Rfam and miRBase                                                                                                                                                                                                                                                                                                                                                        |
| ribozyme                         | 2          | 2                | Non-coding RNA predicted using sequences from Rfam and miRBase                                                                                                                                                                                                                                                                                                                                                        |
| rRNA                             | 5          | 5                | Non-coding RNA predicted using sequences from Rfam and miRBase                                                                                                                                                                                                                                                                                                                                                        |
| scaRNA                           | 15         | 15               | Non-coding RNA predicted using sequences from Rfam and miRBase                                                                                                                                                                                                                                                                                                                                                        |
| scRNA                            | 1          | 1                | Non-coding RNA predicted using sequences from Rfam and miRBase                                                                                                                                                                                                                                                                                                                                                        |
| snoRNA                           | 238        | 242              | Non-coding RNA predicted using sequences from Rfam and miRBase                                                                                                                                                                                                                                                                                                                                                        |
| snRNA                            | 104        | 106              | Non-coding RNA predicted using sequences from Rfam and miRBase                                                                                                                                                                                                                                                                                                                                                        |
| polymorphic_pseudogene           | 19         | 22               | Pseudogene owing to a SNP/DIP but in other individuals/haplotypes/strains the gene is translated.                                                                                                                                                                                                                                                                                                                     |
| unprocessed_pseudogene           | 593        | 585              | Pseudogene that can contain introns since produced by gene duplication.                                                                                                                                                                                                                                                                                                                                               |
| translated_processed_pseudogene  | 2          | 2                | Pseudogene that has mass spec data suggesting that it is also translated.                                                                                                                                                                                                                                                                                                                                             |
| processed_pseudogene             | 2537       | 2435             | Pseudogene that lack introns and is thought to arise from reverse transcription of mRNA followed by reinsertion of DNA into the genome.                                                                                                                                                                                                                                                                               |
| transcribed_processed_pseudogene | 338        | 169              | Pseudogene where protein homology or genomic structure indicates a pseudogene, but the presence of locus-specific transcripts indicates expression.                                                                                                                                                                                                                                                                   |
| transcribed_unitary_pseudogene   | 101        | 38               | Pseudogene where protein homology or genomic structure indicates a pseudogene, but the presence of locus-specific transcripts indicates expression.                                                                                                                                                                                                                                                                   |

| Biotype                            | Gene Count | Transcript Count | Definition                                                                                                                                                                                                                                                                                                                                                                                                                                |
|------------------------------------|------------|------------------|-------------------------------------------------------------------------------------------------------------------------------------------------------------------------------------------------------------------------------------------------------------------------------------------------------------------------------------------------------------------------------------------------------------------------------------------|
| transcribed_unprocessed_pseudogene | 680        | 327              | Pseudogene where protein homology or genomic structure indicates a pseudogene, but the presence of locus-specific transcripts indicates expression.                                                                                                                                                                                                                                                                                       |
| TEC                                | 755        | 803              | To be Experimentally Confirmed. This is used for non-spliced EST clusters that have polyA features. This category has been specifically created for the ENCODE project to highlight regions that could indicate the presence of protein coding genes that require experimental validation, either by 5' RACE or RT-PCR to extend the transcripts, or by confirming expression of the putatively-encoded peptide with specific antibodies. |
| non_stop_decay                     |            | 10               | Transcript that has polyA features (including signal) without a prior stop codon in the CDS, i.e. a non-genomic polyA tail attached directly to the CDS without 3' UTR. These transcripts are subject to degradation.                                                                                                                                                                                                                     |
| 3prime_overlapping_ncRNA           | 25         | 28               | Transcript where ditag and/or published experimental data strongly supports the existence of short non-coding transcripts transcribed from the 3'UTR.                                                                                                                                                                                                                                                                                     |
| non_coding                         | 2          | 2                | Transcript which is known from the literature to not be protein coding.                                                                                                                                                                                                                                                                                                                                                                   |
| macro_lncRNA                       | 1          | 1                | Unspliced lncRNA that is several kb in size.                                                                                                                                                                                                                                                                                                                                                                                              |

Supplemental Table 2: Dozens of different types of gene and transcript types quantified

| sample accession | Tissue | Sub Tissue                      | Origin       | Age Days | Kept | study title                                                                                                                                  | sample attribute                                                                                                                                                                                                                                                                                                                                                                                                                                                                                                                                                                                                                                                                            | study abstract                                                                                                                                                                                                                                                                                                                                                                                                                                                                                                                                                                                                                                                                                                                                                                                                                                                                                                                                                                                                                                                                                                                                                                                                                                                                                                                                                                                                                                                                                                                                                                                                                                                                                                                                                                                                                                                                                                                                                                                                                                                                                                                                                                                                                                                                                                                                                                                                                                                                                                                                                                                                                                                                                                                                                                                          | study accession | mapping rate |
|------------------|--------|---------------------------------|--------------|----------|------|----------------------------------------------------------------------------------------------------------------------------------------------|---------------------------------------------------------------------------------------------------------------------------------------------------------------------------------------------------------------------------------------------------------------------------------------------------------------------------------------------------------------------------------------------------------------------------------------------------------------------------------------------------------------------------------------------------------------------------------------------------------------------------------------------------------------------------------------------|---------------------------------------------------------------------------------------------------------------------------------------------------------------------------------------------------------------------------------------------------------------------------------------------------------------------------------------------------------------------------------------------------------------------------------------------------------------------------------------------------------------------------------------------------------------------------------------------------------------------------------------------------------------------------------------------------------------------------------------------------------------------------------------------------------------------------------------------------------------------------------------------------------------------------------------------------------------------------------------------------------------------------------------------------------------------------------------------------------------------------------------------------------------------------------------------------------------------------------------------------------------------------------------------------------------------------------------------------------------------------------------------------------------------------------------------------------------------------------------------------------------------------------------------------------------------------------------------------------------------------------------------------------------------------------------------------------------------------------------------------------------------------------------------------------------------------------------------------------------------------------------------------------------------------------------------------------------------------------------------------------------------------------------------------------------------------------------------------------------------------------------------------------------------------------------------------------------------------------------------------------------------------------------------------------------------------------------------------------------------------------------------------------------------------------------------------------------------------------------------------------------------------------------------------------------------------------------------------------------------------------------------------------------------------------------------------------------------------------------------------------------------------------------------------------|-----------------|--------------|
| SRS846894        | Cornea | Cornea - Cell Line Endothelium  | Cell Line    | .        | Kept | Transcriptomic analysis of cultured corneal endothelial cells as a validation for their use in cell-replacement therapy                      | source_name: corneal endothelial cell line    cell type: endothelial    immortalization: telomerase    culture medium: F99                                                                                                                                                                                                                                                                                                                                                                                                                                                                                                                                                                  | The corneal endothelium plays a primary role in maintaining corneal homeostasis and clarity, and must be surgically replaced with allogenic donor corneal endothelium in the event of visually significant dysfunction. However, a worldwide shortage of donor corneal tissue has led to a search for alternative sources of transplantable tissue. Cultured human corneal endothelial cells (HCEnC) have been shown to restore corneal clarity in experimental models of corneal endothelial dysfunction in animal models, but characterization of cultured HCEnC remains incomplete. To this end, we utilized next-generation RNA sequencing technology to compare the transcriptomic profile of ex vivo human corneal endothelium (evHCEnC) with that of primary HCEnC and HCEnC lines, and to determine the utility of cultured and immortalized corneal endothelial cells as models of in vivo corneal endothelium. Multidimensional analyses of the transcriptome datasets demonstrated that primary HCEnC have a closer relationship to evHCEnC than do immortalized HCEnC. Subsequent analyses showed that the majority of the genes specifically expressed in HCEnC (not expressed in ex vivo corneal epithelium or fibroblasts) demonstrated a marked variability of expression in cultured cells compared with evHCEnC. In addition, genes associated with either corneal endothelial cell function or corneal endothelial dystrophies were investigated. Significant differences in gene expression and protein levels were observed in the cultured cells compared with evHCEnC for each of the genes tested except for AGBL1 and LOXHD1, which were not detected by RNA-seq or qPCR. Our transcriptomic analysis suggests that at a molecular level primary HCEnC most closely resemble evHCEC and thus represent a viable therapeutic option for managing corneal endothelial dysfunction. Our findings also suggest that investigators should perform an assessment of the entire transcriptome of cultured HCEnC prior to determination of the potential clinical utility of the cultured HCEnC for the management of corneal endothelial cell failure. Overall design: Transcriptomes from ex vivo corneal endothelium, primary cultures and three cell lines were compared. Three samples of each endothelial cell group were submitted for RNA sequencing for a total of 15 samples. The transcriptome for the ex vivo corneal endothelium was used as the reference (i.e., proxy for in vivo corneal endothelium). Transcript abundances for a subset of genes associated with corneal endothelial cell function or disease were validated with qPCR and western blot. Samples of ex vivo endothelium used for validation were independent replicates not used for RNA-sequencing. | SRP055101       | 83.700       |
| SRS3493151       | Retina | Retina - Adult Tissue AMD MGS 3 | Adult Tissue | .        | Kept | Integrated analysis of genetic variants regulating retinal transcriptome (GREx) identifies genes underlying age-related macular degeneration | id: GSM3191271: R42015-399pL_382-IR_L6; Homo sapiens; RNA-Seq   sample: SRS3493151   run: SRR7461134   patient_number: 382   r_id: 382_3   donor: 07-1068   A69S_rs10490924: G/G   Y402H_rs1061170: C/C   os_od: OD   age: 95   sex: F   mgs_level: 3   cause_of_death: acute cardiac event   death_category: Cardiovascular   cataracts: NA   cataract_timing: NA   ocular_history: IOL   pseudophakic   complicated_medical_history: arthritis, HTN, high chol   smoking_history: NA   cholesterol: yes   heart_disease: NA   hypertension: yes   postmortem_interval_hrs: 13.77   rna_isolation_date: 7/6/15   rna_isolation_batch: isobatch2   rin: 8   library_sequenced_date: 1/29/16 | Age-related macular degeneration (AMD) is a complex multifactorial disease with at least 34 loci contributing to genetic susceptibility. To gain functional understanding of AMD genetics, we generated transcriptional profiles of retina from 453 individuals including both controls and cases at distinct stages of AMD. We integrated retinal transcriptomes, covering 13,662 protein-coding and 1,462 noncoding genes, with genotypes at over 9 million common single nucleotide polymorphisms (SNPs) for expression quantitative trait loci (eQTL) analysis of a tissue not included in Genotype-Tissue Expression (GTEx) and other large datasets. Cis-eQTL analysis revealed 10,474 genes under genetic regulation, including 4,541 eQTLs detected only in the retina. We then integrated the AMD-genome-wide association studies (GWAS) data with eQTLs and ascertained target genes at six loci. Furthermore, using transcriptome wide association analysis (TWAS), we identified 23 additional AMD-associated genes, including RLBP1, HIC1 and PARP12. Our studies expand the genetic landscape of AMD leading to direct targets for biological evaluation and establish the Genotype-Retina Expression (GREx) database as a resource for post-GWAS interpretation of retina-associated traits including glaucoma and diabetic retinopathy. Overall design: Retinal samples from 523 aged post-mortem human subjects from a spectrum of age-related macular degeneration (AMD) were RNA-seq profiled.                                                                                                                                                                                                                                                                                                                                                                                                                                                                                                                                                                                                                                                                                                                                                                                                                                                                                                                                                                                                                                                                                                                                                                                                                                                                                       | SRP151763       | 50.100       |



| sample accession | Tissue | Sub Tissue                      | Origin       | Age Days | Kept                     | study title                                                                                                                                  | sample attribute                                                                                                                                                                                                                                                                                                                                                                                                                                                                                                                                                                                                                                                                                                                                                             | study abstract                                                                                                                                                                                                                                                                                                                                                                                                                                                                                                                                                                                                                                                                                                                                                                                                                                                                                                                                                                                                                                                                                                                                                                                                                                                                                                                                                                                                                                                                                                   | study accession | mapping rate |
|------------------|--------|---------------------------------|--------------|----------|--------------------------|----------------------------------------------------------------------------------------------------------------------------------------------|------------------------------------------------------------------------------------------------------------------------------------------------------------------------------------------------------------------------------------------------------------------------------------------------------------------------------------------------------------------------------------------------------------------------------------------------------------------------------------------------------------------------------------------------------------------------------------------------------------------------------------------------------------------------------------------------------------------------------------------------------------------------------|------------------------------------------------------------------------------------------------------------------------------------------------------------------------------------------------------------------------------------------------------------------------------------------------------------------------------------------------------------------------------------------------------------------------------------------------------------------------------------------------------------------------------------------------------------------------------------------------------------------------------------------------------------------------------------------------------------------------------------------------------------------------------------------------------------------------------------------------------------------------------------------------------------------------------------------------------------------------------------------------------------------------------------------------------------------------------------------------------------------------------------------------------------------------------------------------------------------------------------------------------------------------------------------------------------------------------------------------------------------------------------------------------------------------------------------------------------------------------------------------------------------|-----------------|--------------|
| SRS1597869       | RPE    | RPE - Adult Tissue              | Adult Tissue |          | Kept                     | Region-specific Transcriptome Analysis of the Human Retina and RPE/Choroid                                                                   | gap_accession: phs001151    submitter handle: NEI_RetinaRPE_Choroid    biospecimen repository: NEI_RetinaRPE_Choroid    study name: Region-specific Transcriptome Analysis of the Human Retina and RPE/Choroid    study design: Control Set    biospecimen repository sample id: S16    submitted sample id: S16    submitted subject id: 3    gap_sample_id: 1975628    gap_subject_id: 1622644    sex: female    body site: eye    histological type: RPE/choroid    analyte type: RNA    is tumor: No    subject is affected: No    molecular data type: RNA Seq (NGS)    gap_consent_code: 1    gap_consent_short_name: GRU-NPU                                                                                                                                          | Proper spatial differentiation of retinal cell types is necessary for normal human vision. Many retinal diseases, such as Best disease and male germ cell associated kinase (MAK)-associated retinitis pigmentosa, preferentially affect distinct topographic regions of the retina. While much is known about the distribution of cell types in the retina, the distribution of molecular components across the posterior pole of the eye has not been well-studied. To investigate regional difference in molecular composition of ocular tissues, we assessed differential gene expression across the temporal, macular, and nasal retina and retinal pigment epithelium (RPE)/choroid of human eyes using RNA-Seq. RNA from temporal, macular, and nasal retina and RPE/choroid from four human donor eyes was extracted, poly-A selected, fragmented, and sequenced as 100 bp read pairs. Digital read files were mapped to the human genome and analyzed for differential expression using the Tuxedo... (for more see dbGaP study page.)                                                                                                                                                                                                                                                                                                                                                                                                                                                                  | SRP080886       | 84.000       |
| SRS1747723       | ESC    | ESC - Stem Cell Line            | Stem Cell    |          | low salm on mapping rate | Transcriptomes during lens differentiation of human embryonic stem cells                                                                     | isolate: human embryonic stem cells    age: not applicable   biomaterial provider: Zhongshan Ophthalmic Centre, 54th Xianlie Road, Guangzhou, China   sex: not applicable   tissue: not applicable   cell_line: H9 human embryonic stem cell    cell_type: Human embryonic stem cell    BioSampleModel: Human                                                                                                                                                                                                                                                                                                                                                                                                                                                                | In order to examine the fundamental mechanisms governing lens cells differentiation, we analyzed the transcriptome changes during the differentiation of human embryonic stem cells (hESCs) into lens cells and lentoid bodies. The differentiation of hESCs was induced by a sequential treatments of growth factors. In briefly, Noggin (100ng/ul) was applied from day0 to day6; then a combination of bFGF (100ng/ul) and BMP4/7 (20 ng/ml) was added from day 7 to day 18, followed by bFGF (100ng/ul) and Wnt3a (20 ng/ml) from day19 to day32. Cells at day 0, day 6, day 18 and day 32 were collected for analysis of paired-end RNA sequencing using Illumina HiSeq 2500. The results revealed dynamic transcription network during lentoid bodies differentiation. We observed differential expression of genes involved in signaling pathways, which were considered to be necessary for lens development. These results provide a valuable resource for studying the mechanisms regulating in vitro lentoid body differentiation of hESCs and getting a glimpse of signaling pathway network in lens embryonic development.                                                                                                                                                                                                                                                                                                                                                                          | SRP091605       | 17.900       |
| SRS3492989       | Retina | Retina - Adult Tissue AMD MGS 4 | Adult Tissue |          | Kept                     | Integrated analysis of genetic variants regulating retinal transcriptome (GREx) identifies genes underlying age-related macular degeneration | id: GSM3191108: R42015-21   pf: 232-IR_L3; Homo sapiens; RNA-Seq   sample: SRS3492989   run: SRR7460971   patient_number: 232   r_id: 232_4   donor: 15-0040   A69S_rs10490924: G/G   Y402H_rs1061170: C/T   os_od: OS   age: 103   sex: M   mgs_level: 4   cause_of_death: pneumonia   death_category: Pulmonary   cataracts: NA   cataract_timing: NA   ocular_history: confirmed phakic (OU), AMD   compiled_medical_history: NA   smoking_history: NA   cholesterol: NA   hypertension: NA   heart_disease: NA   postmortem_interval_hrs: 17.68   rna_isolation_date: 6/24/15   rna_isolation_batch: isobatch2   rin: 7.6   library_sequenced_date: 11/20/15                                                                                                             | Age-related macular degeneration (AMD) is a complex multifactorial disease with at least 34 loci contributing to genetic susceptibility. To gain functional understanding of AMD genetics, we generated transcriptional profiles of retina from 453 individuals including both controls and cases at distinct stages of AMD. We integrated retinal transcriptomes, covering 13,662 protein-coding and 1,462 noncoding genes, with genotypes at over 9 million common single nucleotide polymorphisms (SNPs) for expression quantitative trait loci (eQTL) analysis of a tissue not included in Genotype-Tissue Expression (GTEx) and other large datasets. Cis-eQTL analysis revealed 10,474 genes under genetic regulation, including 4,541 eQTLs detected only in the retina. We then integrated the AMD-genome-wide association studies (GWAS) data with eQTLs and ascertained target genes at six loci. Furthermore, using transcriptome wide association analysis (TWAS), we identified 23 additional AMD-associated genes, including RLB1, HIC1 and PARP12. Our studies expand the genetic landscape of AMD leading to direct targets for biological evaluation and establish the Genotype-Retina Expression (GREx) database as a resource for post-GWAS interpretation of retina-associated traits including glaucoma and diabetic retinopathy. Overall design: Retinal samples from 523 aged post-mortem human subjects from a spectrum of age-related macular degeneration (AMD) were RNA-seq profiled. | SRP151763       | 48.400       |
| SRS3493218       | Retina | Retina - Adult Tissue AMD MGS 2 | Adult Tissue |          | Kept                     | Integrated analysis of genetic variants regulating retinal transcriptome (GREx) identifies genes underlying age-related macular degeneration | id: GSM3191338: R42016-403   pf: 442-IR_L7; Homo sapiens; RNA-Seq   sample: SRS3493218   run: SRR7461201   patient_number: 442   r_id: 442_2   donor: 15-1220   A69S_rs10490924: G/G   Y402H_rs1061170: T/T   os_od: OS   age: 92   sex: F   mgs_level: 2   cause_of_death: complete heart block   death_category: Cardiovascular   cataracts: yes   cataract_timing: 2005 & 2011 (unsure which eye first)   ocular_history: confirmed pseudophakic (OU), cataracts (OU)   compiled_medical_history: CABG - 1979, hypertension, hyperlipidemia   smoking_history: NA   cholesterol: yes   heart_disease: NA   hypertension: yes   postmortem_interval_hrs: 18.82   rna_isolation_date: 8/15/16   rna_isolation_batch: isobatch2   rin: 8.4   library_sequenced_date: 9/23/16 | Age-related macular degeneration (AMD) is a complex multifactorial disease with at least 34 loci contributing to genetic susceptibility. To gain functional understanding of AMD genetics, we generated transcriptional profiles of retina from 453 individuals including both controls and cases at distinct stages of AMD. We integrated retinal transcriptomes, covering 13,662 protein-coding and 1,462 noncoding genes, with genotypes at over 9 million common single nucleotide polymorphisms (SNPs) for expression quantitative trait loci (eQTL) analysis of a tissue not included in Genotype-Tissue Expression (GTEx) and other large datasets. Cis-eQTL analysis revealed 10,474 genes under genetic regulation, including 4,541 eQTLs detected only in the retina. We then integrated the AMD-genome-wide association studies (GWAS) data with eQTLs and ascertained target genes at six loci. Furthermore, using transcriptome wide association analysis (TWAS), we identified 23 additional AMD-associated genes, including RLB1, HIC1 and PARP12. Our studies expand the genetic landscape of AMD leading to direct targets for biological evaluation and establish the Genotype-Retina Expression (GREx) database as a resource for post-GWAS interpretation of retina-associated traits including glaucoma and diabetic retinopathy. Overall design: Retinal samples from 523 aged post-mortem human subjects from a spectrum of age-related macular degeneration (AMD) were RNA-seq profiled. | SRP151763       | 43.800       |

| sample accession  | Tissue | Sub Tissue                      | Origin       | Age Days | Kept | study title                                                                                                                                                                                        | sample attribute                                                                                                                                                                                                                                                                                                                                                                                                                                                                                                                                                                                                                                                                                                                                                     | study abstract                                                                                                                                                                                                                                                                                                                                                                                                                                                                                                                                                                                                                                                                                                                                                                                                                                                                                                                                                                                                                                                                                                                                                                                                                                                                                                                                                                                                                                                                                                    | study accession | mapping rate |
|-------------------|--------|---------------------------------|--------------|----------|------|----------------------------------------------------------------------------------------------------------------------------------------------------------------------------------------------------|----------------------------------------------------------------------------------------------------------------------------------------------------------------------------------------------------------------------------------------------------------------------------------------------------------------------------------------------------------------------------------------------------------------------------------------------------------------------------------------------------------------------------------------------------------------------------------------------------------------------------------------------------------------------------------------------------------------------------------------------------------------------|-------------------------------------------------------------------------------------------------------------------------------------------------------------------------------------------------------------------------------------------------------------------------------------------------------------------------------------------------------------------------------------------------------------------------------------------------------------------------------------------------------------------------------------------------------------------------------------------------------------------------------------------------------------------------------------------------------------------------------------------------------------------------------------------------------------------------------------------------------------------------------------------------------------------------------------------------------------------------------------------------------------------------------------------------------------------------------------------------------------------------------------------------------------------------------------------------------------------------------------------------------------------------------------------------------------------------------------------------------------------------------------------------------------------------------------------------------------------------------------------------------------------|-----------------|--------------|
| SRS1305277        | Cornea | Cornea - Adult Tissue           | Adult Tissue |          | Kept | Transcriptome profiling of human keratoconus corneas through RNA sequencing identifies collagen synthesis disruption and downregulation of core elements of TGF- $\beta$ , Hippo, and Wnt pathways | source_name: Cornea   disease state: non-KTCN   study: discovery   tissue: cornea                                                                                                                                                                                                                                                                                                                                                                                                                                                                                                                                                                                                                                                                                    | To understand better the factors contributing to keratoconus (KTCN), we used RNA sequencing to perform a transcriptome profile of human KTCN corneas. Over 82% of the genes and almost 75% of the transcripts detected as differentially expressed in KTCN and non-KTCN corneas were confirmed in the replication study using another set of samples. We used these differentially expressed genes to generate a network of KTCN-deregulated genes. We found an extensive disruption of collagen synthesis and maturation pathways, as well as downregulation of the core elements of the TGF- $\beta$ , Hippo, and Wnt signaling pathways influencing corneal organization. We identified long noncoding RNAs (lncRNAs) and conducted a computational analysis of their potential functions, and found that lncRNAs regulated the processing and expression of the aforementioned genes. This first comprehensive transcriptome profiling of human KTCN corneas points further to a complex etiology of KTCN. Overall design: Transcription profiling of 25 KTCN and 25 non-KTCN corneas using RNA-Seq                                                                                                                                                                                                                                                                                                                                                                                                           | SRP070148       | 46.500       |
| E-MTAB-4377-RNA49 | Retina | Retina - Adult Tissue           | Adult Tissue |          | Kept | RNAseq 50 Normal Human Retina                                                                                                                                                                      |                                                                                                                                                                                                                                                                                                                                                                                                                                                                                                                                                                                                                                                                                                                                                                      | RNA-seq of post-mort retina donor without clinically relevant visual impairment. Ploy-A enriched. 75-nt paired-end. Short time lapse between tissue sampling and cDNA generation.                                                                                                                                                                                                                                                                                                                                                                                                                                                                                                                                                                                                                                                                                                                                                                                                                                                                                                                                                                                                                                                                                                                                                                                                                                                                                                                                 | E-MTAB-4377     | 81.600       |
| SRS9493229        | Retina | Retina - Adult Tissue AMD MGS 3 | Adult Tissue |          | Kept | Integrated analysis of genetic variants regulating retinal transcriptome (GREx) identifies genes underlying age-related macular degeneration                                                       | id: GSM3191346: R42016-1109F_45-IR_L3: Homo sapiens; RNA-Seq   sample: SRS9493229   run: SRR7461209   patient_number: 45   r_id: 45_3   donor: 14-1029   A69S_rs10490924: G/G   Y402H_rs1061170: T/T   os_od: OD   age: 90   sex: M   mgs_level: 3   cause_of_death: respiratory failure   death_category: Pulmonary   cataracts: NA   cataract_timing: NA   ocular_history: cataracts (OU), confirmed pseudophakic   compiled_medical_history: HTN, Non-Hodgkins lymphoma, prostate cancer, bladder cancer, UTI, light smoker (20yrs)   smoking_history: yes   cholesterol: NA   heart_disease: NA   hypertension: yes   postmortem_interval_hrs: 16.02   rna_isolation_date: 12/19/14   rna_isolation_batch: isobatch1   rim: 8.5   library_sequenced_date: 3/8/16 | Age-related macular degeneration (AMD) is a complex multifactorial disease with at least 34 loci contributing to genetic susceptibility. To gain functional understanding of AMD genetics, we generated transcriptional profiles of retina from 453 individuals including both controls and cases at distinct stages of AMD. We integrated retinal transcriptomes, covering 13,662 protein-coding and 1,462 noncoding genes, with genotypes at over 9 million common single nucleotide polymorphisms (SNPs) for expression quantitative trait loci (eQTL) analysis of a tissue not included in Genotype-Tissue Expression (GTEx) and other large datasets. Cis-eQTL analysis revealed 10,474 genes under genetic regulation, including 4,541 eQTLs detected only in the retina. We then integrated the AMD-genome-wide association studies (GWAS) data with eQTLs and ascertained target genes at six loci. Furthermore, using transcriptome wide association analysis (TWAS), we identified 23 additional AMD-associated genes, including RLBP1, HIC1 and PARP12. Our studies expand the genetic landscape of AMD leading to direct targets for biological evaluation and establish the Genotype-Retina Expression (GREx) database as a resource for post-GWAS interpretation of retina-associated traits including glaucoma and diabetic retinopathy. Overall design: Retinal samples from 523 aged post-mortem human subjects from a spectrum of age-related macular degeneration (AMD) were RNA-seq profiled. | SRP151763       | 50.500       |
| SRS2582161        | Retina | Retina - Fetal Tissue           | Fetal Tissue | 73       | Kept | Molecular anatomy of the developing human retina                                                                                                                                                   | D73P                                                                                                                                                                                                                                                                                                                                                                                                                                                                                                                                                                                                                                                                                                                                                                 |                                                                                                                                                                                                                                                                                                                                                                                                                                                                                                                                                                                                                                                                                                                                                                                                                                                                                                                                                                                                                                                                                                                                                                                                                                                                                                                                                                                                                                                                                                                   | SRP119766       | 74.500       |

Supplemental Table 3: Full metadata for 10 random eye samples. Full metadata available as supplementary file “metadata.csv.”

| Sub Tissue                          | Cluster | Count |
|-------------------------------------|---------|-------|
| Retina - Adult Tissue               | 1       | 107   |
| RPE - Cell Line                     | 2       | 50    |
| Cells - EBV-transformed lymphocytes | 3       | 30    |
| Pancreas                            | 4       | 30    |
| Lens - Stem Cell Line               | 5       | 2     |
| RPE - Fetal Tissue                  | 5       | 7     |
| RPE - Stem Cell Line                | 5       | 16    |
| Cornea - Adult Tissue               | 6       | 25    |
| Cornea - Endothelium                | 7       | 16    |
| Cornea - Fetal Endothelium          | 7       | 2     |
| Cornea - Stem Cell Endothelium      | 8       | 4     |

| Sub Tissue                                | Cluster | Count |
|-------------------------------------------|---------|-------|
| ESC - Stem Cell Line                      | 9       | 6     |
| Lens - Stem Cell Line                     | 9       | 2     |
| Retina - 3D Organoid Stem Cell            | 9       | 5     |
| Retina - Fetal Eye                        | 9       | 3     |
| Retina - 3D Organoid Stem Cell            | 10      | 47    |
| Retina - RGC Stem Cell                    | 10      | 3     |
| RPE - Adult Tissue                        | 11      | 48    |
| Retina - Fetal Tissue                     | 12      | 35    |
| Brain - Amygdala                          | 13      | 30    |
| Brain - Anterior cingulate cortex (BA24)  | 13      | 27    |
| Brain - Caudate (basal ganglia)           | 13      | 28    |
| Brain - Cerebellar Hemisphere             | 13      | 1     |
| Brain - Cortex                            | 13      | 28    |
| Brain - Frontal Cortex (BA9)              | 13      | 29    |
| Brain - Hippocampus                       | 13      | 29    |
| Brain - Hypothalamus                      | 13      | 28    |
| Brain - Nucleus accumbens (basal ganglia) | 13      | 30    |
| Brain - Putamen (basal ganglia)           | 13      | 28    |
| Brain - Spinal cord (cervical c-1)        | 13      | 28    |
| Brain - Substantia nigra                  | 13      | 28    |
| Pituitary                                 | 13      | 1     |
| Lung                                      | 14      | 29    |
| Whole Blood                               | 15      | 19    |
| Brain - Cerebellar Hemisphere             | 16      | 28    |
| Brain - Cerebellum                        | 16      | 29    |
| Brain - Cortex                            | 16      | 1     |
| Thyroid                                   | 17      | 27    |
| Heart - Atrial Appendage                  | 18      | 30    |
| Heart - Left Ventricle                    | 18      | 28    |
| Skin - Not Sun Exposed (Suprapubic)       | 19      | 29    |
| Skin - Sun Exposed (Lower leg)            | 19      | 24    |
| Muscle - Skeletal                         | 20      | 29    |
| Prostate                                  | 20      | 1     |
| Artery - Aorta                            | 21      | 30    |

| Sub Tissue                            | Cluster | Count |
|---------------------------------------|---------|-------|
| Artery - Coronary                     | 21      | 27    |
| Artery - Tibial                       | 21      | 28    |
| Adipose - Subcutaneous                | 22      | 27    |
| Adipose - Visceral (Omentum)          | 22      | 27    |
| Artery - Coronary                     | 22      | 3     |
| Breast - Mammary Tissue               | 22      | 8     |
| Esophagus - Gastroesophageal Junction | 22      | 1     |
| Small Intestine - Terminal Ileum      | 22      | 1     |
| Nerve - Tibial                        | 23      | 30    |
| Bladder                               | 24      | 4     |
| Breast - Mammary Tissue               | 24      | 22    |
| Cervix - Endocervix                   | 24      | 2     |
| Fallopian Tube                        | 24      | 2     |
| Minor Salivary Gland                  | 24      | 23    |
| Prostate                              | 24      | 4     |
| Vagina                                | 24      | 1     |
| Pituitary                             | 25      | 28    |
| Kidney - Cortex                       | 26      | 27    |
| Stomach                               | 27      | 21    |
| Bladder                               | 28      | 5     |
| Colon - Sigmoid                       | 28      | 29    |
| Colon - Transverse                    | 28      | 29    |
| Esophagus - Gastroesophageal Junction | 28      | 28    |
| Esophagus - Muscularis                | 28      | 28    |
| Small Intestine - Terminal Ileum      | 28      | 27    |
| Stomach                               | 28      | 9     |
| Adrenal Gland                         | 29      | 30    |
| Small Intestine - Terminal Ileum      | 30      | 1     |
| Spleen                                | 30      | 30    |
| Cells - Transformed fibroblasts       | 31      | 30    |
| Liver                                 | 32      | 30    |
| Cervix - Ectocervix                   | 33      | 2     |
| Esophagus - Mucosa                    | 33      | 30    |
| Minor Salivary Gland                  | 33      | 7     |

| Sub Tissue                       | Cluster | Count |
|----------------------------------|---------|-------|
| Vagina                           | 33      | 3     |
| Cornea - Cell Line Endothelium   | 34      | 9     |
| Cells - Leukemia cell line (CML) | 35      | 5     |
| Cervix - Ectocervix              | 36      | 4     |
| Cervix - Endocervix              | 36      | 3     |
| Fallopian Tube                   | 36      | 5     |
| Ovary                            | 36      | 4     |
| Testis                           | 36      | 1     |
| Uterus                           | 36      | 4     |
| Vagina                           | 36      | 1     |
| Testis                           | 37      | 4     |

Supplemental Table 4: Counts of Sub Tissues in each tSNE - dbscan based cluster group

| ID         | Description                                                     | GeneRatio | pvalue   | qvalue | geneID                                                                                                                                                                                                                                                                                                       |
|------------|-----------------------------------------------------------------|-----------|----------|--------|--------------------------------------------------------------------------------------------------------------------------------------------------------------------------------------------------------------------------------------------------------------------------------------------------------------|
| GO:0030198 | extracellular matrix organization                               | 51/668    | 3.11e-17 | 0.000  | VCAM1 FOXC1 P4HA1 LOX NID2 COL1A2 COL27A1 ICAM1 DDR2 WT1 COL14A1 POSTN COL3A1 PDPN HAS2 SMOC2 COL5A1 TGFBI COL6A3 DCN CDH1 TTR SULF1 ECM2 ADAMTS5 CCDC80 ITGB4 ITGA8 COL4A6 FOXF1 DPP4 ITGB6 FN1 COL1A1 ITGB3 SERPINE1 FMOD NPNT MMP19 CREB3L1 A2M BGN COL8A1 TNXB GFAP SPINT1 MMP7 ELF3 THBS1 COL17A1 MYH11 |
| GO:0007156 | homophilic cell adhesion via plasma membrane adhesion molecules | 28/592    | 1.54e-12 | 0.000  | PCDHGB5 PCDHGA6 PCDHGA7 PCDHGA3 PCDHGA5 PCDHGA2 PCDHGB3 PCDHGA4 PCDHGA11 PCDHGA9 PCDHGB2 PCDHA3 PCDHGA12 PCDHB7 PCDHGB4 PCDHGA1 PCDHGB1 PCDHGB7 FAT3 DSCAM PCDHA1 PCDHGC3 PCDHB8 VSTM2L KIRREL3 PCDHA2 PCDHA8 CDH13                                                                                          |
| GO:0050878 | regulation of body fluid levels                                 | 50/668    | 6.53e-11 | 0.000  | CYP26B1 FZD6 GUCA1B LYN COL1A2 XDH ADM DOCK6 TFPI2 COL3A1 PDPN HEG1 HAS2 SLC7A11 HK2 EDNRB AQP4 CLDN4 PLAU PLAT ENTPD2 F2RL1 HRG SCNN1A CD9 CLDN1 APOE FOXB1 EHD2 COL1A1 ITGB3 SERPINE1 TRPV4 PRTN3 PRKCG SCNN1B CAV1 KDF1 NFE2 A2M SCNN1G AQP1 GRHL3 ALOX12B TP63 THBS1 AGR2 ANXA8 FLG2 KRT1                |
| GO:0061448 | connective tissue development                                   | 34/668    | 1.85e-10 | 0.000  | HOXB3 HOXC4 HOXA5 HOXA3 BMP5 BMPR1B COL27A1 MGP GDF7 WT1 WNT11 ALX1 COL14A1 PLA2G16 PRRX1 MSX2 SNAL2 COL5A1 FOXA1 TGFBI COL6A3 STC1 SULF1 EGR1 MATN2 FRZB OSR2 COL1A1 EFEMP1 PITX1 TRPV4 NKX3-2 ACTA2 CHI3L1                                                                                                 |

| ID         | Description                                 | GeneRatio | pvalue   | qvalue | geneID                                                                                                                                                                                                                                                                                                 |
|------------|---------------------------------------------|-----------|----------|--------|--------------------------------------------------------------------------------------------------------------------------------------------------------------------------------------------------------------------------------------------------------------------------------------------------------|
| GO:0031589 | cell-substrate adhesion                     | 37/668    | 3.08e-09 | 0.000  | VCAM1 NID2 GBP1 POSTN COL3A1<br>PDPN HAS2 SMOC2 PTN ALOX15<br>ACTN3 HOXA7 ECM2 PLAU EPHA1<br>TNFRSF12A CCDC80 ITGB4 HRG<br>ITGA8 FOXF1 RHOD CCL28 ANGPT1<br>ITGB6 FN1 COL1A1 ITGB3 SERPINE1<br>NPNT WNT4 COL8A1 CEACAM6<br>THBS1 AGR2 APOD COL17A1                                                     |
| GO:0030335 | positive regulation of cell migration       | 45/668    | 1.04e-08 | 0.000  | HGF LGALS3 IGFBP5 EGF LYN VEGFD<br>ICAM1 DDR2 WNT11 ANXA1 POSTN<br>PDPN HAS2 SEMA3C GPNMB SNAL2<br>SMOC2 PTP4A1 PLAU EPHA1 FPR2<br>F2RL1 IL1R1 PTGS2 FOXF1 RHOD<br>FAM110C ANGPT1 EDN3 SRPX2<br>FOXC2 FN1 COL1A1 ITGB3 SERPINE1<br>TRPV4 ENPP2 GRB7 ANXA3 CAV1<br>CEACAM6 S100A14 RAB25 THBS1<br>NR4A3 |
| GO:0001503 | ossification                                | 38/668    | 2.00e-08 | 0.000  | IFITM1 HGF GPC3 EGR2 IGFBP5<br>FOXC1 HOXA3 DHRS3 BMP5 BMPR1B<br>MGP DDR2 WNT11 IGF2 TOB1 MSX2<br>FHL2 GPNMB SNAL2 IGFBP3 FGFR2<br>PTN ASPN STC1 ALOX15 CEBPB<br>PTGS2 PHOSPHO1 KREMEN2 OSR2<br>ISG15 COL1A1 NPNT DLX5 ALPL<br>CREB3L1 WNT4 TP63                                                        |
| GO:0050678 | regulation of epithelial cell proliferation | 32/668    | 3.05e-07 | 0.000  | GPC3 HOXA5 BMP5 KLF9 SIX1 PAX2<br>VEGFD XDH HAS2 EGR3 SNAL2<br>EDNRB FGFR2 PTN SULF1 DLX6<br>ALDH1A2 SERPINF1 APOE OSR2<br>ESRP2 ZFP36 ITGB3 DLX5 HTR2B<br>CAV1 KDF1 CCL2 TP63 THBS1 NR4A3<br>NR4A1                                                                                                    |
| GO:0030099 | myeloid cell differentiation                | 29/592    | 8.11e-05 | 0.006  | HIST1H4L HIST1H4F POU4F2<br>HIST1H3F POU4F1 HIST1H3I<br>HIST1H3C HIST1H3B HIST1H3J PRKCB<br>HIST1H4C SIGLEC15 HIST1H4A<br>TREM2 HIST1H4I HIST1H3A LILRB4<br>FES C1QC HIST1H3G HIST1H4D CSF1R<br>HIST1H4B TYROBP HIST1H4J GPR68<br>EVI2B CCL3 SPI1                                                      |
| GO:0030099 | myeloid cell differentiation                | 29/668    | 6.08e-04 | 0.008  | HIST1H4K HOXB8 HOXB7 PIR GPC3<br>LGALS3 HOXA5 LYN UBD INHBA EPO<br>HOXA7 CEBPB B2M F2RL1 LIF MT1G<br>IL31RA MB ISG15 ZFP36 HOXA9<br>PRTN3 NFE2 CA2 IRE4 FOS THBS1<br>NR4A3                                                                                                                             |
| GO:0050769 | positive regulation of neurogenesis         | 28/592    | 1.20e-03 | 0.043  | POU4F2 MYB P2RY12 HEYL E2F1<br>VWC2L ASCL1 TRIM67 NEFL DSCAM<br>ISLR2 ALKAL2 PAX6 GDF6 CX3CR1<br>FES OLIG2 STMN2 SHH RIT2<br>NEUROG3 CUX2 CPNE6 ADRA2B IRX3<br>DKK1 ITPKA DLX1                                                                                                                         |

Supplemental Table 5: Top GO terms enriched between fetal retina and organoid retina, a er paring of redundant terms with REVIGO<sup>1</sup>

## Reference

1. Supek F, Bošnjak M, Škunca N, Šmuc T. REVIGO summarizes and visualizes long lists of gene ontology terms. *PLoS One*. 2011;6:e21800.
